# Supplementary material for: Characterization of the Rainbow Trout Egg MicroRNA Transcriptome
Source: PLoS One. 2012 Jun 25;7(6):e39649. doi: 10.1371/journal.pone.0039649 (PMC3382587; doi:10.1371/journal.pone.0039649)
Supplement: Table S2 — Novel miRNAs identified from rainbow trout eggs. (XLSX) [file pone.0039649.s003.xlsx]

## Sheet: Sheet1
Table S2. Novel miRNAs identified from rainbow trout egg
No.	miRNA	Sequence	Size	No. of reads	Chromosome	Strand	Start position		End position
1	omy-miR-nov1-3p	AAAUGCUCUGUUUGAUU	17	3	24	-	27640355		27640371
2	omy-miR-nov2-5p	AAAUGUAGAUUGACCGGU	18	5	19	-	36854678		36854695
	omy-miR-nov2-5p	AAAUGUAGAUUGACCGGU			23	-	16156279		16156296
3	omy-miR-nov3-5p	AACAUAUUAAGUAGAGC	17	5	24	-	27916354		27916370
4	omy-miR-nov4-5p	AACAUGUUUUAACUCUUUG	19	3	18	-	48313088		48313106
5	omy-miR-nov5-3p	AACGAGCUGUUGGACUAUGAAGAGGA	26	6	19	-	26490204		26490229
6	omy-miR-nov6-3p	AACUAAGUGUUUGUGGG	17	5	20	-	28477152		28477168
7	omy-miR-nov7-5p	AACUGGUAUCUGUUUAAU	18	3	18	-	12860268		12860285
8	omy-miR-nov8-5p	AAGGUCACUGGUUCGAGUCCG	21	3	4	+	1657070		1657090
	omy-miR-nov8-5p	AAGGUCACUGGUUCGAGUCCG			4	+	5539156		5539176
	omy-miR-nov8-5p	AAGGUCACUGGUUCGAGUCCG			4	+	7390747		7390767
	omy-miR-nov8-5p	AAGGUCACUGGUUCGAGUCCG			4	-	26977409		26977429
	omy-miR-nov8-5p	AAGGUCACUGGUUCGAGUCCG			4	-	62357177		62357197
	omy-miR-nov8-5p	AAGGUCACUGGUUCGAGUCCG			16	-	38488628		38488648
	omy-miR-nov8-5p	AAGGUCACUGGUUCGAGUCCG			18	+	14368668		14368688
	omy-miR-nov8-5p	AAGGUCACUGGUUCGAGUCCG			18	+	19195097		19195117
	omy-miR-nov8-5p	AAGGUCACUGGUUCGAGUCCG			18	+	24647001		24647021
	omy-miR-nov8-5p	AAGGUCACUGGUUCGAGUCCG			18	-	38164755		38164775
	omy-miR-nov8-5p	AAGGUCACUGGUUCGAGUCCG			18	+	41424889		41424909
	omy-miR-nov8-5p	AAGGUCACUGGUUCGAGUCCG			18	+	47437094		47437114
	omy-miR-nov8-5p	AAGGUCACUGGUUCGAGUCCG			19	-	6530250		6530270
	omy-miR-nov8-5p	AAGGUCACUGGUUCGAGUCCG			19	-	12961059		12961079
	omy-miR-nov8-5p	AAGGUCACUGGUUCGAGUCCG			19	-	43452724		43452744
	omy-miR-nov8-5p	AAGGUCACUGGUUCGAGUCCG			19	+	47786951		47786971
	omy-miR-nov8-5p	AAGGUCACUGGUUCGAGUCCG			19	+	48345813		48345833
	omy-miR-nov8-5p	AAGGUCACUGGUUCGAGUCCG			21	+	36289655		36289675
	omy-miR-nov8-5p	AAGGUCACUGGUUCGAGUCCG			25	-	25865926		25865946
	omy-miR-nov8-5p	AAGGUCACUGGUUCGAGUCCG			25	+	33307740		33307760
	omy-miR-nov8-3p	AAGGUCACUGGUUCGAGUCCG			25	+	38074501		38074521
9	omy-miR-nov9-3p	AAUAAAUUAAUAAAGUGACAA	21	13	19	-	26108955		26108975
10	omy-miR-nov10-5p	AAUAGAAUAGGACGUGUGU	19	3	16	-	44475475		44475493
11	omy-miR-nov11-5p	AAUGACUACCGCCCUGAAGCA	21	4	23	-	9719490		9719510
12	omy-miR-nov12-5p	AAUGUAGAUUGACCGGU	17	8	25	+	13150829		13150845
13	omy-miR-nov13-3p	AAUUUAUUUAUAUAGCCCU	19	5	4	+	15708707		15708725
14	omy-miR-nov14-5p	ACCUGUGCGAAUUGUAGU	18	3	20	+	17278178		17278195
15	omy-miR-nov15-3p	ACGUGUGUGUGUGUGGAUGUGU	22	3	23	-	1853730		1853751
16	omy-miR-nov16-5p	ACUACUGAGCCUCAUUUUGACU	22	20	19	-	13616268		13616289
17	omy-miR-nov17-5p	ACUGGAUACUGUUUAAAA	18	22	4	+	71439476		71439493
18	omy-miR-nov18-5p	ACUUCCAUCUGGCCACUCUACC	22	19	25	-	29378989		29379010
19	omy-miR-nov19-5p	AGAAGAAGGAGCUCUCUGA	19	3	4	-	44906023		44906041
	omy-miR-nov19-5p	AGAAGAAGGAGCUCUCUGA			4	-	47121201		47121219
	omy-miR-nov19-5p	AGAAGAAGGAGCUCUCUGA			4	-	50013724		50013742
20	omy-miR-nov20-5p	AGAGCCCGGAUAGCUCAGUUGGU	23	4	4	-	63420408		63420430
21	omy-miR-nov21-5p	AGAGCCGUUCGUGACAGG	18	13	4	+	56579276		56579293
	omy-miR-nov21-5p	AGAGCCGUUCGUGACAGG			4	+	56652304		56652321
22	omy-miR-nov22-5p	AGCGAUCCGGCGGCGUU	17	4	4	+	56634304		56634320
23	omy-miR-nov23-3p	AGGAUUUUGGAUUUGGUC	18	3	18	+	31017897		31017914
24	omy-miR-nov24-3p	AGGGAAGGUGAUGAUGAC	18	5	10	-	27794611		27794628
25	omy-miR-nov25-3p	AGUGACACCUUGACAUGGA	19	3	25	+	14237736		14237754
26	omy-miR-nov26-5p	AGUUGGGAGAGCUUUAGACUGA	22	42	4	+	30228667		30228688
	omy-miR-nov26-5p	AGUUGGGAGAGCUUUAGACUGA			4	+	55611423		55611444
27	omy-miR-nov27-3p	AUAGCGCUACCACCACCACCACCAC	25	3	4	+	49743780		49743803
28	omy-miR-nov28-3p	AUAUAUAUGCAUGUAUAUGUGU	22	7	19	+	12947044		12947065
	omy-miR-nov28-5p	AUAUAUAUGCAUGUAUAUGUGU			19	+	47664435		47664456
	omy-miR-nov28-5p	AUAUAUAUGCAUGUAUAUGUGU			20	-	15401137		15401158
	omy-miR-nov28-3p	AUAUAUAUGCAUGUAUAUGUGU			25	-	18948082		18948103
	omy-miR-nov28-3p	AUAUAUAUGCAUGUAUAUGUGU			25	+	2782401		2782422
29	omy-miR-nov29-3p	AUCAAAUGUGGGAAGCAGUG	20	4	4	+	2396854		2396873
30	omy-miR-nov30-3p	AUCAGGUGCUGUAAGCUU	18	73	4	+	60360753		60360770
31	omy-miR-nov31-5p	AUCCCGGACGAGCCCCCC	18	3	16	+	28486525		28486542
32	omy-miR-nov32-3p	AUGACAUUGACAUGAUCUG	19	3	18	+	2743197		2743215
	omy-miR-nov32-3p	AUGACAUUGACAUGAUCUG			18	-	14263519		14263537
	omy-miR-nov32-3p	AUGACAUUGACAUGAUCUG			EST GI: NW_003041426	+	150731		150749
33	omy-miR-nov33-5p	AUGAUUAGAGGCCUUGGGGC	20	3	4	+	63712817		63712836
34	omy-miR-nov34-3p	AUGCUUCACUGUAGGGAUGGUGU	23	4	15	-	4138914		4138936
35	omy-miR-nov35-3p	AUGGACAGGUUGAAGUUU	18	34	16	+	29739509		29739526
36	omy-miR-nov36-5p	AUUAAAAAAGGAGUAGAAA	19	4	16	-	8603964		8603982
37	omy-miR-nov37-5p	AUUAGUCGGUAGAGCAUCAGAC	22	3	4	+	28184807		28184828
38	omy-miR-nov38-3p	AUUAUAACGCUAGUUG	16	6	4	-	3199670		3199685
39	omy-miR-nov39-3p	AUUCACUUUAUUGUUUAU	18	45	4	-	2887190		2887207
40	omy-miR-nov40-3p	AUUGUGUGUAGAUUGCUGAGGA	22	3	24	+	13949114		13949135
41	omy-miR-nov41-5p	AUUUAGUAGAUUUUGUUU	18	4	6	-	44068697		44068714
42	omy-miR-nov42-3p	AUUUGGUUUGGUUUGUUU	18	22	19	-	6604121		6604138
43	omy-miR-nov43-3p	AUUUUAGAAUAAGGCUGUAACA	22	4	4	+	16986441		16986462
44	omy-miR-nov44-5p	AUUUUAGUCUCAUCUGACCAGAG	23	3	20	+	12708116		12708138
45	omy-miR-nov45-3p	AUUUUUUGUUGUUGUUGUUUGG	22	3	20	-	4806570		4806591
46	omy-miR-nov46-3p	CAAAACUAAGUUCUGACU	18	4	19	-	29225154		29225171
47	omy-miR-nov47-3p	CACGUGGACUGGGAGAUGUU	20	160	4	+	39266858		39266877
	omy-miR-nov47-3p	CACGUGGACUGGGAGAUGUU			4	-	39769845		39769864
	omy-miR-nov47-3p	CACGUGGACUGGGAGAUGUU			4	-	41618685		41618704
	omy-miR-nov47-3p	CACGUGGACUGGGAGAUGUU			4	+	44347067		44347086
	omy-miR-nov47-3p	CACGUGGACUGGGAGAUGUU			4	+	46904874		46904893
	omy-miR-nov47-3p	CACGUGGACUGGGAGAUGUU			4	-	48824234		48824253
	omy-miR-nov47-3p	CACGUGGACUGGGAGAUGUU			4	+	56151334		56151353
	omy-miR-nov47-3p	CACGUGGACUGGGAGAUGUU			4	+	62776945		62776964
48	omy-miR-nov48-5p	CACUACAGGCUGAUCCAACUUUGA	24	233	4	-	29316933		29316956
	omy-miR-nov48-5p	CACUACAGGCUGAUCCAACUUUGA			4	-	30597486		30597509
	omy-miR-nov48-5p	CACUACAGGCUGAUCCAACUUUGA			4	-	54080749		54080772
49	omy-miR-nov49-5p	CAGAAACACACACACUCAC	19	4	4	-	71481176		71481194
	omy-miR-nov49-5p	CAGAAACACACACACUCAC			4	-	71589075		71589093
	omy-miR-nov49-5p	CAGAAACACACACACUCAC			4	+	71628632		71628650
50	omy-miR-nov50-3p	CAGAAACUCAAACAGGAAG	19	3	18	-	26997656		26997674
51	omy-miR-nov51-3p	CAGAGGAGACUGUGUGAAUCAGG	23	3	18	-	14052493		14052515
52	omy-miR-nov52-5p	CAGGACGGUAGAUCUCCAGGAAGAG	25	24	16	-	40829349		40829373
53	omy-miR-nov53-5p	CAGGUGCUGUAAGCAUU	17	3	25	+	29810371		29810387
54	omy-miR-nov54-5p	CAUCACCACCAUCAUCAUCC	20	3	25	-	14427501		14427520
55	omy-miR-nov55-3p	CAUCUCUCUUUUUCUCUCUC	20	3	19	+	36606071		36606090
	omy-miR-nov55-3p	CAUCUCUCUUUUUCUCUCUC			24	+	30966802		30966821
56	omy-miR-nov56-5p	CAUGCAUGCAUGCAUGCCUGC	21	5	25	+	28645062		28645082
57	omy-miR-nov57-3p	CAUUUGAUCACGUCAGA	17	8	24	+	11837430		11837446
58	omy-miR-nov58-5p	CAUUUUAUUUAUUUACCCA	19	6	4	-	27445826		27445844
	omy-miR-nov58-5p	CAUUUUAUUUAUUUACCCA			4	-	36887651		36887669
	omy-miR-nov58-5p	CAUUUUAUUUAUUUACCCA			4	-	38809616		38809634
	omy-miR-nov58-5p	CAUUUUAUUUAUUUACCCA			4	-	41882744		41882762
	omy-miR-nov58-5p	CAUUUUAUUUAUUUACCCA			4	-	44259549		44259567
	omy-miR-nov58-5p	CAUUUUAUUUAUUUACCCA			4	+	52947959		52947977
	omy-miR-nov58-5p	CAUUUUAUUUAUUUACCCA			4	+	56465274		56465292
	omy-miR-nov58-5p	CAUUUUAUUUAUUUACCCA			4	-	59914038		59914056
	omy-miR-nov58-5p	CAUUUUAUUUAUUUACCCA			4	+	60237857		60237875
	omy-miR-nov58-5p	CAUUUUAUUUAUUUACCCA			4	+	60490468		60490486
59	omy-miR-nov59-5p	CAUUUUUUGUUGUUGUUCU	19	5	25	-	22182269		22182287
60	omy-miR-nov60-5p	CCAAGGCCAUGGGAAUCAUGA	21	3	25	-	36194133		36194153
61	omy-miR-nov61-3p	CCUGACCAAGGCCCUUCUCCCC	22	3	18	-	6418462		6418483
62	omy-miR-nov62-3p	CCUGUUGAGCUUGACUCUAGUCC	23	7	4	+	63714663		63714685
63	omy-miR-nov63-3p	CCUUUCUCUCUCUCGCUCUCUC	22	3	24	+	13842049		13842070
64	omy-miR-nov64-5p	CGAGUAGGAGGGCCGCCGCGGUGA	24	31	20	+	49982148		49982171
65	omy-miR-nov65-3p	CGUAUGUGUGUGUGUGUUA	19	3	19	-	19147494		19147512
	omy-miR-nov65-3p	CGUAUGUGUGUGUGUGUUA			20	+	18110450		18110468
	omy-miR-nov65-5p	CGUAUGUGUGUGUGUGUUA			23	+	40516337		40516355
	omy-miR-nov65-5p	CGUAUGUGUGUGUGUGUUA			EST GI: NW_003044075	-	9767		9785
	omy-miR-nov65-3p	CGUAUGUGUGUGUGUGUUA			EST GI: NW_003050692	+	26665		26683
66	omy-miR-nov66-5p	CGUGGGGAGUUUGACUGGGGCGGUA	25	6	4	-	58165833		58165857
67	omy-miR-nov67-5p	CGUGUGUGUGUUUGUGUAUGU	21	3	15	+	7273899		7273919
	omy-miR-nov67-5p	CGUGUGUGUGUUUGUGUAUGU			18	+	48582492		48582512
	omy-miR-nov67-5p	CGUGUGUGUGUUUGUGUAUGU			19	-	6386062		6386082
	omy-miR-nov67-5p	CGUGUGUGUGUUUGUGUAUGU			19	-	29281786		29281806
	omy-miR-nov67-5p	CGUGUGUGUGUUUGUGUAUGU			25	-	18613769		18613789
68	omy-miR-nov68-5p	CUCCAGGAACAGGUUUGGGGA	21	3	19	-	46008830		46008850
69	omy-miR-nov69-3p	CUCUCUCUCUCGUAUCUCUCUCUCUC	26	3	25	-	3175863		3175887
70	omy-miR-nov70-3p	CUCUGUCUCUCUCUCUGUCUCUC	23	9	19	+	84053		84075
71	omy-miR-nov71-3p	CUCUGUCUGUCUGUCUGGCUGU	22	3	25	-	5466712		5466733
72	omy-miR-nov72-5p	CUGAAAAACAUCCCCACAGCAUGAU	25	4	4	+	2571537		2571561
	omy-miR-nov72-5p	CUGAAAAACAUCCCCACAGCAUGAU			24	-	2491249		2491273
73	omy-miR-nov73-3p	CUGGUGUGUUUUGGAUCAUUGUCCUG	26	4	4	+	10661765		10661790
74	omy-miR-nov74-3p	CUUGGAGGCGUGGGUUCGAAUCC	23	11	4	+	27360262		27360284
	omy-miR-nov74-3p	CUUGGAGGCGUGGGUUCGAAUCC			4	+	27367954		27367976
	omy-miR-nov74-3p	CUUGGAGGCGUGGGUUCGAAUCC			4	-	49528523		49528545
	omy-miR-nov74-3p	CUUGGAGGCGUGGGUUCGAAUCC			4	-	49531212		49531234
75	omy-miR-nov75-5p	CUUGGCACACCUGUAUUUGGGG	22	3	20	-	19916976		19916997
76	omy-miR-nov76-3p	CUUUCUCUCUUUUUCUCUCU	20	3	24	+	26942963		26942982
77	omy-miR-nov77-5p	GAAAUUAGACUGGGCUUUAGGG	22	3	23	-	23082834		23082855
78	omy-miR-nov78-5p	GACUGACUUUGUGUGUGUGUGUG	23	4	19	+	1622912		1622934
	omy-miR-nov78-5p	GACUGACUUUGUGUGUGUGUGUG			15	+	44893907		44893929
79	omy-miR-nov79-5p	GACUUGGUCUAAGCUCCUCAG	21	282	24	+	36888108		36888128
80	omy-miR-nov80-5p	GAGGACGUUUUAGAUGGCA	19	8	24	-	7996160		7996178
81	omy-miR-nov81-5p	GAGGAGGACAGAGAGGAGGAGGA	23	3	4	+	834003		834025
82	omy-miR-nov82-3p	GAGGUGGAGCGUGAGC	16	9	23	+	40428006		40428021
83	omy-miR-nov83-5p	GAUACUGUUAACCAUGAGAUU	21	3	4	+	68223711		68223731
	omy-miR-nov83-5p	GAUACUGUUAACCAUGAGAUU			4	+	68482046		68482066
84	omy-miR-nov84-3p	GAUGAAACGUGGCUGGGUCUUUC	23	4	25	-	18390096		18390118
85	omy-miR-nov85-3p	GCAAAGGCUCUGAAUACUUAUGUA	24	3	19	-	18798029		18798052
	omy-miR-nov85-3p	GCAAAGGCUCUGAAUACUUAUGUA			19	+	32571564		32571587
	omy-miR-nov85-5p	GCAAAGGCUCUGAAUACUUAUGUA			25	+	15594804		15594827
86	omy-miR-nov86-5p	GCAAUGGAUAACGUUUCUGAC	21	9	4	+	61035725		61035745
87	omy-miR-nov87-5p	GCAGCUAGGAAUAAUUGAAUAGGACU	26	5	4	+	60188632		60188657
88	omy-miR-nov88-3p	GCAGGCGCGGGUAACCCGUUGAAC	24	8	4	+	63710307		63710330
	omy-miR-nov88-3p	GCAGGCGCGGGUAACCCGUUGAAC			4	+	63721858		63721881
89	omy-miR-nov89-5p	GCAGUUUUAUCUGGUAAAGCGA	22	75	4	+	56637054		56637075
	omy-miR-nov89-5p	GCAGUUUUAUCUGGUAAAGCGA			20	+	49981736		49981757
	omy-miR-nov89-5p	GCAGUUUUAUCUGGUAAAGCGA			EST GI: NW_001879059	+	13928		13949
90	omy-miR-nov90-5p	GCCUGGAUAGCUCAGCUGGUAGAGC	25	3	4	-	63423483		63423507
91	omy-miR-nov91-3p	GCCUUGGUCUAGGGGUAUGAUUCU	24	6	4	-	35841559		35841582
92	omy-miR-nov92-3p	GCGAGCUACCGCCUGUCCC	19	27	20	+	49989573		49989591
93	omy-miR-nov93-5p	GCGCGCGCGCGCGUGUGGUGUG	22	9	4	-	16176920		16176942
	omy-miR-nov93-5p	GCGCGCGCGCGCGUGUGGUGUG			19	+	1257284		1257306
	omy-miR-nov93-3p	GCGCGCGCGCGCGUGUGGUGUG			20	-	14923014		14923036
	omy-miR-nov93-3p	GCGCGCGCGCGCGUGUGGUGUG			25	-	17713841		17713863
94	omy-miR-nov94-3p	GCUUAAUGAUGACUGUU	17	3	16	+	47210730		47210746
95	omy-miR-nov95-5p	GCUUACGGCCAUACCGGCC	19	4	4	+	30258261		30258279
	omy-miR-nov95-5p	GCUUACGGCCAUACCGGCC			4	+	30260385		30260403
	omy-miR-nov95-5p	GCUUACGGCCAUACCGGCC			4	+	30260916		30260934
	omy-miR-nov95-5p	GCUUACGGCCAUACCGGCC			4	+	30262509		30262527
	omy-miR-nov95-5p	GCUUACGGCCAUACCGGCC			4	+	30263040		30263058
	omy-miR-nov95-5p	GCUUACGGCCAUACCGGCC			4	+	30263571		30263589
	omy-miR-nov95-5p	GCUUACGGCCAUACCGGCC			4	+	30264102		30264120
96	omy-miR-nov96-5p	GCUUCCAUCUGGCCACUCUACC	22	19	18	+	32694786		32694807
	omy-miR-nov96-5p	GCUUCCAUCUGGCCACUCUACC			20	+	9564783		9564804
97	omy-miR-nov97-3p	GGAUGAUGAGGACGAGGAUGA	21	5	25	+	13935384		13935404
98	omy-miR-nov98-5p	GGCUCGUUAGUCUAGGGGUA	20	4	20	-	46034513		46034532
99	omy-miR-nov99-5p	GGCUCGUUCGUCUAGGGGUAUGAUUC	26	525	EST GI: NW_001884427	+	148135		148160
100	omy-miR-nov100-5p	GGGAAAACGUUCUCAGA	17	5	4	+	68069379		68069395
101	omy-miR-nov101-5p	GGGCUUGGCGGAAUCAGCGG	20	70	4	+	63714632		63714651
102	omy-miR-nov102-3p	GGGGAAGGUCCCCGGUUC	18	3	20	+	6103397		6103414
103	omy-miR-nov103-5p	GGUCCCAGCUCUCUGCAGG	19	4	25	+	18265081		18265099
	omy-miR-nov103-5p	GGUCCCAGCUCUCUGCAGG			25	+	18390510		18390528
104	omy-miR-nov104-3p	GGUGAACUCUGACCUCCG	18	3	5	+	46275282		46275299
105	omy-miR-nov105-5p	GUAACGUGGCUCUGGAAGA	19	4	19	-	44898225		44898243
106	omy-miR-nov106-5p	GUAGAUGGUGUAGAUGCUGA	20	3	25	+	34484656		34484675
107	omy-miR-nov107-3p	GUCAGCCCUCGAUCCAAGC	19	753	20	+	49984535		49984553
108	omy-miR-nov108-3p	GUGAAGCAUGGUGGUUGCAGCAUCA	25	5	19	+	14595009		14595033
	omy-miR-nov108-3p	GUGAAGCAUGGUGGUUGCAGCAUCA			23	+	21153658		21153682
	omy-miR-nov108-3p	GUGAAGCAUGGUGGUUGCAGCAUCA			24	-	30218075		30218099
	omy-miR-nov108-3p	GUGAAGCAUGGUGGUUGCAGCAUCA			25	-	7708796		7708820
109	omy-miR-nov109-3p	GUGAGAGAAAUCGCUCAGGACU	22	3	25	+	36167542		36167563
110	omy-miR-nov110-5p	GUGAUUGACCUUGGAUGU	18	3	20	+	17574858		17574875
111	omy-miR-nov111-3p	GUGGACUGGGAGAUGUU	17	200	4	+	30307240		30307256
	omy-miR-nov111-3p	GUGGACUGGGAGAUGUU			4	+	47662331		47662347
	omy-miR-nov111-3p	GUGGACUGGGAGAUGUU			4	+	54984479		54984495
	omy-miR-nov111-3p	GUGGACUGGGAGAUGUU			4	+	60775929		60775945
	omy-miR-nov111-3p	GUGGACUGGGAGAUGUU			4	+	65301652		65301668
112	omy-miR-nov112-5p	GUGGAUGACAACAGAGGACA	20	28	19	+	3861200		3861219
113	omy-miR-nov113-3p	GUGGGCCACUUUUGGUA	17	3	4	+	16027182		16027198
	omy-miR-nov113-3p	GUGGGCCACUUUUGGUA			20	+	30235983		30235999
114	omy-miR-nov114-3p	GUGUAUAUUUAUAAAUGUA	19	3	4	-	9917375		9917393
	omy-miR-nov114-3p	GUGUAUAUUUAUAAAUGUA			16	-	26497732		26497750
115	omy-miR-nov115-3p	GUGUCUCUCUCUUUGUUUC	18	3	18	-	115987		116005
	omy-miR-nov115-5p	GUGUCUCUCUCUUUGUUUC			EST GI: NW_003041412	+	7990		8008
116	omy-miR-nov116-5p	GUGUGUGUCUCUCUGUGUGUG	21	3	4	-	1225457		1225477
117	omy-miR-nov117-5p	GUGUGUGUCUUUCUCUCUCUCUC	23	3	25	-	27482985		27483007
118	omy-miR-nov118-5p	GUGUUUGUGUAUGUGUGUGUGCA	23	3	25	-	1977658		1977680
119	omy-miR-nov119-3p	GUGUUUUUCUCUCGCUCUUC	20	5	19	+	44702379		44702398
120	omy-miR-nov120-5p	GUUAGUACUUGGAUGGGAGAC	21	5	18	-	47871128		47871149
121	omy-miR-nov121-3p	GUUCAUAUCCCGGACGAGCCCC	22	6	4	+	38433418		38433439
	omy-miR-nov121-3p	GUUCAUAUCCCGGACGAGCCCC			4	-	39313464		39313485
	omy-miR-nov121-3p	GUUCAUAUCCCGGACGAGCCCC			4	-	45268995		45269016
	omy-miR-nov121-3p	GUUCAUAUCCCGGACGAGCCCC			4	-	45276993		45277014
	omy-miR-nov121-3p	GUUCAUAUCCCGGACGAGCCCC			4	+	63173461		63173482
122	omy-miR-nov122-5p	GUUCGAGCCCAGGUUGGA	18	27	18	-	35865616		35865633
123	omy-miR-nov123-5p	GUUCGGAUCCGAGUCACGGCA	21	4	4	-	42260428		42260448
124	omy-miR-nov124-3p	GUUCUUUCUUUUUUGUUCA	19	3	16	+	15210516		15210534
125	omy-miR-nov125-3p	GUUGGGUUUGGAGAAGGGAGA	21	3	20	-	30557530		30557550
126	omy-miR-nov126-5p	GUUGUGUGUGUCGUUGUGUGUG	22	3	4	+	40991756		40991777
127	omy-miR-nov127-3p	GUUUAUGUAUGUGUAUAUGUAU	22	54	4	-	30663445		30663466
	omy-miR-nov127-5p	GUUUAUGUAUGUGUAUAUGUAU			13	+	29711745		29711766
	omy-miR-nov127-3p	GUUUAUGUAUGUGUAUAUGUAU			18	+	46760319		46760340
128	omy-miR-nov128-5p	GUUUCUCUAGUGUAGUGGUUAUC	23	70	4	-	62394891		62394913
129	omy-miR-nov129-3p	GUUUCUGUAGUGUAGUGGUUAUU	23	9	4	-	64137629		64137651
130	omy-miR-nov130-5p	GUUUGUUCGUGUGUGUGUCUUU	22	4	25	-	26900782		26900803
131	omy-miR-nov131-3p	GUUUGUUUGUCUGUCGGUUUGUCUG	25	3	20	+	32969783		32969807
132	omy-miR-nov132-3p	UAAACAAAGAGAACACUGA	19	4	19	-	37351195		37351213
133	omy-miR-nov133-3p	UAAAGAAUUGUUGUGAUUAUA	21	4	4	-	57562640		57562660
134	omy-miR-nov134-5p	UAAAGCGAAUGAUUAGAG	18	4	4	-	53596595		53596612
135	omy-miR-nov135-5p	UAACUGAGUCAGGUUUGUAGGC	22	5	4	+	66390290		66390311
	omy-miR-nov135-5p	UAACUGAGUCAGGUUUGUAGGC			25	+	18960012		18960033
136	omy-miR-nov136-3p	UAACUGUUUGUGGUUUU	17	3	24	+	982077		982093
137	omy-miR-nov137-5p	UAACUUUGGAUUGGAGAUG	19	3	19	-	11206629		11206647
138	omy-miR-nov138-5p	UAAGACUUGCAGGACUU	17	4	4	+	14477058		14477074
139	omy-miR-nov139-5p	UAAUAUGACAUGUGAGCCACA	21	3	18	+	16166921		16166941
140	omy-miR-nov140-5p	UAAUAUGACUUCCAUGGUG	19	22	25	-	3239006		3239024
141	omy-miR-nov141-5p	UAAUGUAAACCUUGGAU	17	3	18	-	30984975		30984991
142	omy-miR-nov142-3p	UACAUACCUCUGCAUAAUCAUG	22	35	23	+	31746167		31746188
143	omy-miR-nov143-3p	UACUCAAAUGUGUGUGUGUGUGUGU	25	4	19	+	47543266		47543290
144	omy-miR-nov144-5p	UACUUUGGCACUGAUUUUCUCC	22	3	4	-	27284091		27284112
	omy-miR-nov144-5p	UACUUUGGCACUGAUUUUCUCC			4	-	36859225		36859246
	omy-miR-nov144-5p	UACUUUGGCACUGAUUUUCUCC			19	+	2801797		2801818
145	omy-miR-nov145-3p	UAGAGCGGAGGACUGUAGC	19	3	EST GI: NW_003050167	+	817		835
146	omy-miR-nov146-5p	UAGAGGAGACACUGUAGAAAG	21	4	21	+	38633115		38633135
147	omy-miR-nov147-5p	UAGGAAUAAUGGAAUAGCACUCC	23	892	EST GI: NW_001879022	-	293591		293613
148	omy-miR-nov148-5p	UAUGAUCGAUUUGAUUUGCUGCUGU	25	22	16	+	15303088		15303112
	omy-miR-nov148-5p	UAUGAUCGAUUUGAUUUGCUGCUGU			18	-	28636263		28636287
149	omy-miR-nov149-5p	UAUUUGUGACUCUGAGA	17	3	25	+	36408220		36408236
150	omy-miR-nov150-3p	UAUUUUUAGAAGCCAUGUUG	20	3	18	-	16865341		16865360
151	omy-miR-nov161-3p	UCAAAUCCCGGACGAGCCCCUA	22	6	4	+	52567247		52567268
152	omy-miR-nov152-5p	UCAACUGUGGGAGCAAUUAUU	21	5	24	-	6193320		6193340
153	omy-miR-nov153-3p	UCAAGCUCUGUCAAGUUGGAUGG	23	3	18	-	41869738		41869760
154	omy-miR-nov154-3p	UCACAAAUCUUGCUGCUGU	19	15	19	+	13627122		13627140
155	omy-miR-nov155-5p	UCACUCUGCGGUCCAACUCAU	21	3	20	+	11086138		11086158
156	omy-miR-nov156-5p	UCAGGCCUUUAUGGUAGAGUGG	22	8	1	+	50281773		50281794
	omy-miR-nov156-5p	UCAGGCCUUUAUGGUAGAGUGG			4	+	66165717		66165738
	omy-miR-nov156-5p	UCAGGCCUUUAUGGUAGAGUGG			4	-	66667644		66667665
	omy-miR-nov156-5p	UCAGGCCUUUAUGGUAGAGUGG			13	-	37063255		37063276
	omy-miR-nov156-5p	UCAGGCCUUUAUGGUAGAGUGG			16	-	11848189		11848210
	omy-miR-nov156-5p	UCAGGCCUUUAUGGUAGAGUGG			19	+	37936857		37936878
	omy-miR-nov156-5p	UCAGGCCUUUAUGGUAGAGUGG			20	-	14920224		14920245
	omy-miR-nov156-5p	UCAGGCCUUUAUGGUAGAGUGG			25	-	21970796		21970817
157	omy-miR-nov157-3p	UCAUCGACUUUGGCUCUGCCAGC	23	3	25	-	16008589		16008611
158	omy-miR-nov158-5p	UCAUGGAGUCUGUUUCUGAC	20	3	19	-	17752411		17752430
159	omy-miR-nov159-5p	UCAUUUUGCAGGGCUCUGGCA	21	38	13	-	280517		280537
160	omy-miR-nov160-5p	UCCCACAUGGUCUAGCGGUUAGG	23	898	25	+	36322230		36322252
	omy-miR-nov160-5p	UCCCACAUGGUCUAGCGGUUAGG			25	-	36844315		36844337
161	omy-miR-nov161-5p	UCCGACUUCAACUGUAGAUG	20	4	19	-	21558314		21558333
162	omy-miR-nov162-5p	UCCGACUUCAACUGUAUGUACA	22	3	19	-	3488353		3488374
163	omy-miR-nov163-3p	UCCGAGUCACGGCACCAA	18	4	25	+	15541840		15541857
164	omy-miR-nov164-3p	UCCGUCUGUCCGUCUGUCCGUCUG	24	5	13	-	38432481		38432504
165	omy-miR-nov165-3p	UCCUGAAGUCCACAAUCAUCU	21	3	20	+	14339458		14339478
	omy-miR-nov165-3p	UCCUGAAGUCCACAAUCAUCU			EST GI: NW_003045504	+	3786		3806
166	omy-miR-nov166-5p	UCGAUUCCGAUUGGCUGAAG	20	7	EST GI: NW_001884475	-	24580		24599
167	omy-miR-nov167-5p	UCGGCGCGCGGCGGCGGC	18	10	19	+	48014481		48014498
168	omy-miR-nov168-3p	UCGGUAGUGUCAGGACA	17	4	25	+	1166482		1166498
169	omy-miR-nov169-3p	UCUCAACCUAUUCUCAAACU	20	207	4	+	56637103		56637122
	omy-miR-nov169-3p	UCUCAACCUAUUCUCAAACU			4	-	56725047		56725066
	omy-miR-nov169-3p	UCUCAACCUAUUCUCAAACU			4	+	63712845		63712864
170	omy-miR-nov170-3p	UCUCUCUCUCUCUCUCCUCU	20	4	18	+	36390696		36390715
	omy-miR-nov170-3p	UCUCUCUCUCUCUCUCCUCU	20	4	19	+	29584042		29584061
171	omy-miR-nov171-5p	UCUGACUUCAACUGUGUGUGUGUAUA	26	4	19	-	35866160		35866185
	omy-miR-nov171-5p	UCUGACUUCAACUGUGUGUGUGUAUA			25	+	14212039		14212064
172	omy-miR-nov172-5p	UCUGUCUGUCUCUCUCUGUC	20	4	20	+	31142024		31142043
173	omy-miR-nov173-3p	UCUGUGUCUGUGUCUGUCUGUG	22	4	25	+	405512		405533
174	omy-miR-nov174-5p	UCUUUCUUUCUUUCUGUCUCUC	22	3	20	+	17055655		17055676
175	omy-miR-nov175-5p	UGAACUGAAACACGAGA	17	3	24	-	16594444		16594460
176	omy-miR-nov176-3p	UGAAUUUUGGCCCAUUCCUCCUGA	24	49	19	+	42938585		42938608
177	omy-miR-nov177-3p	UGAGAUACUGUAGGAAAA	18	3	4	-	2700013		2700030
	omy-miR-nov177-3p	UGAGAUACUGUAGGAAAA			4	-	2808892		2808909
178	omy-miR-nov178-5p	UGAGAUUGUUGAUGUCAU	18	7	4	+	17609575		17609592
179	omy-miR-nov179-3p	UGAGCUUUACAGCGCCC	17	3	20	+	49981102		49981118
180	omy-miR-nov180-5p	UGAGGUCCUCGGAUCGGCCCCGCU	24	164	20	+	49990592		49990615
181	omy-miR-nov181-5p	UGAUAUAUUUUUAUUUUU	18	3	4	-	6943254		6943271
	omy-miR-nov181-5p	UGAUAUAUUUUUAUUUUU			4	-	25544709		25544726
	omy-miR-nov181-5p	UGAUAUAUUUUUAUUUUU			18	-	19704334		19704351
	omy-miR-nov181-5p	UGAUAUAUUUUUAUUUUU			18	+	24046619		24046636
	omy-miR-nov181-3p	UGAUAUAUUUUUAUUUUU			20	-	25981912		25981929
182	omy-miR-nov182-3p	UGCAAUUUUUGGAAAAAU	18	3	15	-	41863224		41863241
183	omy-miR-nov183-3p	UGCGGACCAGGGGAAUCCGACUU	23	88	20	+	49983217		49983239
184	omy-miR-nov184-5p	UGGACUAAAGAAUCUGCCAACUCCUG	26	6	16	+	3901488		3901513
185	omy-miR-nov185-5p	UGGAUGAGCUGCACUACCUGAGC	23	62	13	-	40024123		40024145
186	omy-miR-nov186-5p	UGGCGCAAUGGAUAACGUUCUGA	23	9	4	-	57890361		57890384
187	omy-miR-nov187-5p	UGGCUGGGACUGUUUAUC	18	5	9	+	16729257		16729274
188	omy-miR-nov188-5p	UGGUCCAAGAAUGUAAGUAUG	21	3	4	+	38750490		38750510
189	omy-miR-nov189-3p	UGUAAUAUAUAUGCCAUUUU	20	3	16	-	50383433		50383452
190	omy-miR-nov190-3p	UGUAAUGAUGGGGACUCUA	19	3	20	-	35148216		35148234
191	omy-miR-nov191-3p	UGUAAUUAUUGGGGUCUGAUUUGUC	25	25	23	+	11332520		11332544
192	omy-miR-nov192-5p	UGUACUGUGACAUACUGAAGCAGA	24	3	25	+	11804525		11804548
193	omy-miR-nov193-3p	UGUAUGUGUUCUUGCGAU	18	9	18	+	39615096		39615113
194	omy-miR-nov194-3p	UGUAUUGUGUCUGUGUGUGUAGU	23	6	25	+	16685187		16685209
195	omy-miR-nov195-5p	UGUCUGAGCUUUAAAAA	17	4	25	+	35059341		35059357
196	omy-miR-nov196-5p	UGUCUGUCGUUGUCACUGA	19	3	16	-	5948585		5948603
	omy-miR-nov196-5p	UGUCUGUCGUUGUCACUGA	19	3	20	+	21205624		21205642
197	omy-miR-nov197-3p	UGUGGUUCUCAAUCAGAGG	19	6	20	+	22968788		22968806
198	omy-miR-nov198-3p	UGUGUACUUAGACUUGCAUG	20	3	4	+	28586739		28586758
	omy-miR-nov198-3p	UGUGUACUUAGACUUGCAUG			4	+	56566440		56566459
	omy-miR-nov198-3p	UGUGUACUUAGACUUGCAUG			4	+	56604861		56604880
	omy-miR-nov198-3p	UGUGUACUUAGACUUGCAUG			4	-	56633190		56633209
	omy-miR-nov198-3p	UGUGUACUUAGACUUGCAUG			4	-	63720275		63720294
199	omy-miR-nov199-3p	UGUGUGAAUAUUUUGUUU	18	3	4	-	29883520		29883537
	omy-miR-nov199-3p	UGUGUGAAUAUUUUGUUU			4	+	59796009		59796026
	omy-miR-nov199-3p	UGUGUGAAUAUUUUGUUU			4	-	64105679		64105696
200	omy-miR-nov200-5p	UGUGUGUGCUGUGUGUGUGGGUGUG	25	3	16	+	118088		118111
	omy-miR-nov200-5p	UGUGUGUGCUGUGUGUGUGGGUGUG			16	+	39314038		39314061
	omy-miR-nov200-5p	UGUGUGUGCUGUGUGUGUGGGUGUG			25	+	1201306		1201329
201	omy-miR-nov201-3p	UGUUCCUCAUGGUCUGAGA	19	3	20	-	51377995		51378013
202	omy-miR-nov202-3p	UGUUGCAGACUGAAGAAA	18	4	20	-	24670514		24670531
203	omy-miR-nov203-3p	UGUUGGAGAUUGUUUGAUU	19	3	16	-	38598039		38598057
204	omy-miR-nov204-3p	UGUUGUUUAAGUGUUCCCUUUAUU	24	4	24	-	34240292		34240315
205	omy-miR-nov205-3p	UGUUUGUCAUAGUCACUGUUA	21	3	13	+	23650331		23650351
206	omy-miR-nov206-3p	UGUUUGUCUGUUUCUCUCUCU	21	3	20	+	8881613		8881633
207	omy-miR-nov207-5p	UGUUUUUGUUCUUGUUUAUUUAUUUU	26	6	4	-	32149621		32149645
208	omy-miR-nov208-5p	UUCAAGUCCGGGCUCUGGCUGGG	23	5	25	+	11357204		11357226
209	omy-miR-nov209-5p	UUCACUUUAUUGUUUAU	17	26	25	+	25084181		25084197
210	omy-miR-nov210-3p	UUCCAGGUGCUGUAAGCUU	19	3	4	+	43358946		43358964
211	omy-miR-nov211-5p	UUGACCCAGCAUCUCCAGC	19	4	25	-	11129931		11129949
212	omy-miR-nov212-5p	UUGAUGUCAGGGCUUUGUGAUGGC	24	17	4	-	758195		758218
	omy-miR-nov212-5p	UUGAUGUCAGGGCUUUGUGAUGGC			18	+	47446888		47446911
213	omy-miR-nov213-3p	UUGAUUUUUGGAAUAGGGA	19	75	13	+	20282751		20282769
214	omy-miR-nov214-3p	UUGCUGCUGGUGUUGGUG	18	3	25	+	7621224		7621241
	omy-miR-nov214-3p	UUGCUGCUGGUGUUGGUG			25	-	7735668		7735685
215	omy-miR-nov215-3p	UUGGAAGAAAGAACUCAGGAG	21	3	19	-	16434667		16434687
	omy-miR-nov215-3p	UUGGAAGAAAGAACUCAGGAG			25	-	29992066		29992086
216	omy-miR-nov216-5p	UUGGGUCAUUGUCAUGCUGGAAGA	24	3	20	-	38554816		38554839
217	omy-miR-nov217-3p	UUGGUGCGAGAGGUCCCGGGU	21	11	4	-	40205003		40205023
	omy-miR-nov217-3p	UUGGUGCGAGAGGUCCCGGGU			4	-	44886246		44886266
218	omy-miR-nov218-5p	UUGUGGGUUAUUGUUAAGA	19	10	25	+	19830768		19830786
219	omy-miR-nov219-5p	UUGUGUAAUGGUUAGCACUCUGG	23	5	23	-	20101793		20101814
220	omy-miR-nov220-3p	UUGUGUGUCUGAUCAGG	17	5	19	-	2749935		2749951
221	omy-miR-nov221-5p	UUGUGUUGUGAUGAUAAUCC	20	9	20	-	32661529		32661548
222	omy-miR-nov222-3p	UUGUUAUUUUGCGUCUA	17	3	25	-	22091501		22091517
223	omy-miR-nov223-5p	UUUAAUUGUCGCUUUAAUCA	20	28	24	+	19999209		19999228
224	omy-miR-nov224-3p	UUUAGUAGUAUGCUUAGGG	19	3	20	+	7647181		7647199
225	omy-miR-nov225-5p	UUUCUCUUUCUUUCUCUCUC	20	3	9	+	32614063		32614082
	omy-miR-nov225-3p	UUUCUCUUUCUUUCUCUCUC			10	+	26586541		26586560
226	omy-miR-nov226-3p	UUUCUUUCUCUCUCUCGCUCUC	22	3	9	-	4866609		4866630
	omy-miR-nov226-3p	UUUCUUUCUCUCUCUCGCUCUC			20	-	2396729		2396750
	omy-miR-nov226-3p	UUUCUUUCUCUCUCUCGCUCUC			20	-	2620113		2620134
227	omy-miR-nov227-5p	UUUGCGGUUCUGUGUGGA	18	3	4	+	23884461		23884478
	omy-miR-nov227-3p	UUUGCGGUUCUGUGUGGA			10	-	19957608		19957625
	omy-miR-nov227-3p	UUUGCGGUUCUGUGUGGA			19	-	43240482		43240499
	omy-miR-nov227-3p	UUUGCGGUUCUGUGUGGA			20	-	30969092		30969109
	omy-miR-nov227-3p	UUUGCGGUUCUGUGUGGA			23	-	36554869		36554886
228	omy-miR-nov228-5p	UUUGGUUUGGUUUGUUUA	18	4	4	-	4963286		4963303
	omy-miR-nov228-5p	UUUGGUUUGGUUUGUUUA			19	-	28773537		28773554
229	omy-miR-nov229-3p	UUUUAGACUGACUUUUAGUG	20	3	25	-	37728213		37728232
230	omy-miR-nov230-5p	AAAUGCUCUGUUUGAUU	17	26	16	+	24834794		24834817
